# Supplementary material
Source: publisher figshare collection journal article supplement (https://tandf.figshare.com/ndownloader/files/21615255)
Supplement: Supplementary file 1 [file 21615255]

Supplementary Material

MOR1


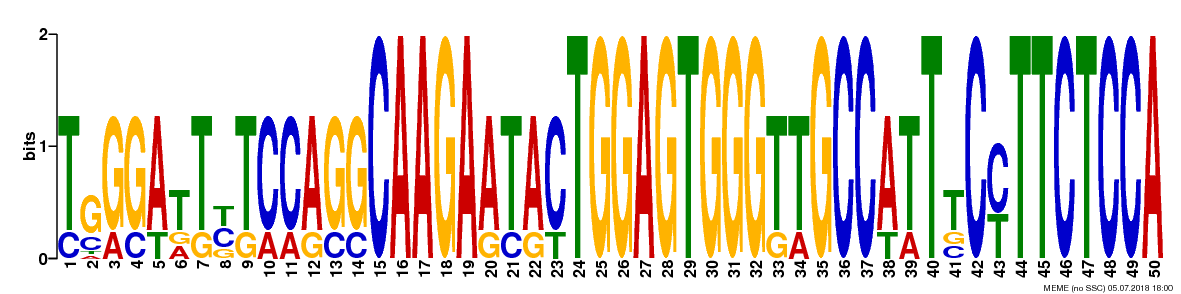


MOR2


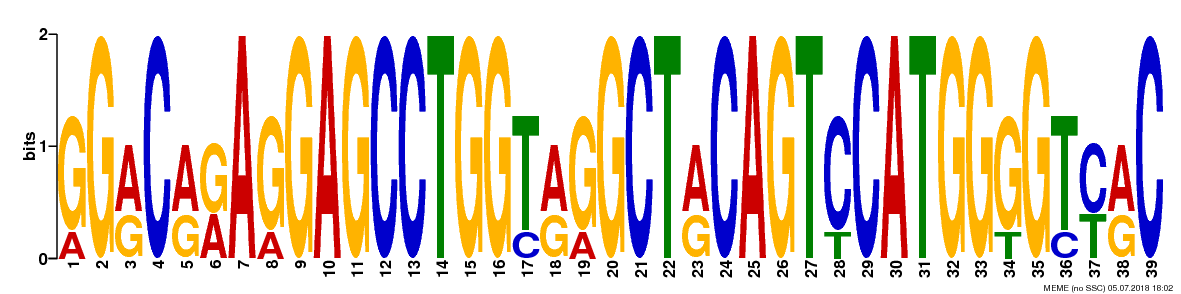


MOR3


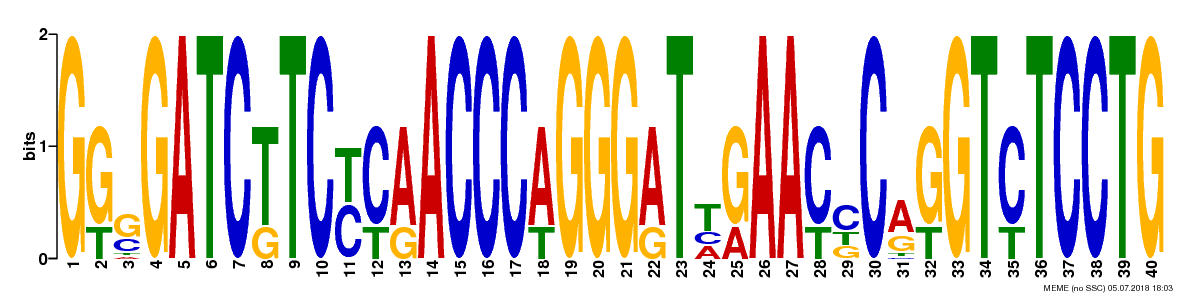


MOR4


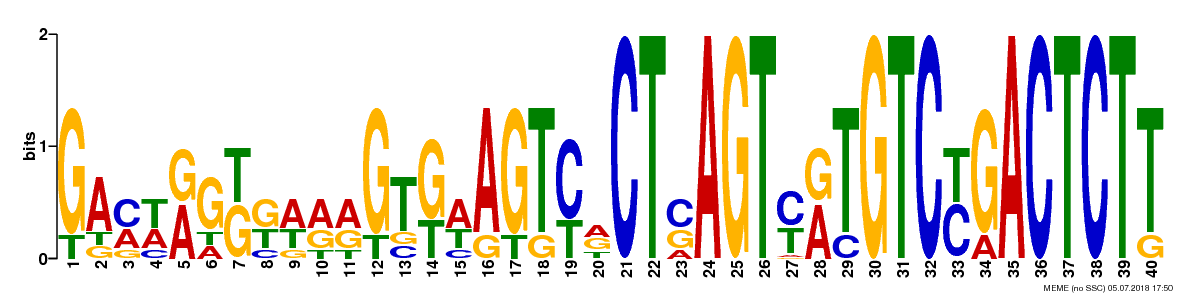


MOR5


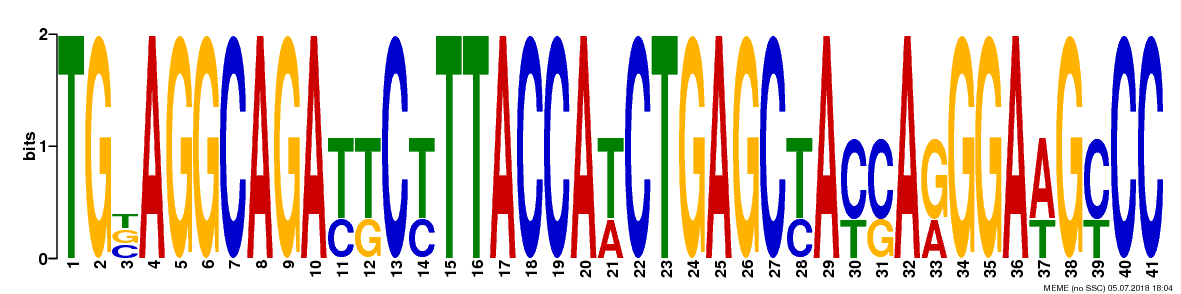


**Supplementary Figure 1.** Sequence logos for the five motifs found by MEME Suite from the positive strand of cattle ORs promoter region.
